# Supplementary material
Source: PubMed Central journal article supplement (PMC6464374)
Supplement: NIHMS1006149-supplement-Appdx.pdf [file NIHMS1006149-supplement-Appdx.pdf]

# THE LANCET

## **Supplementary webappendix**

This webappendix formed part of the original submission and has been peer reviewed. We post it as supplied by the authors.

Supplement to: Strathdee SA, Hallett TB, Bobrova N, et al. HIV and risk environment for injecting drug users: the past, present, and future. *Lancet* 2010; published online July 20. DOI:10.1016/S0140-6736(10)60743-X.

**Technical specification of the mathematical simulation model**

The methods will be described in the following three parts: (i) the technical specification of the mathematical simulation model used for Odessa and Karachi; (ii) the analytic framework; (iii) the data and sources for parameter values; and, (iv) Methods for Nairobi IDU modelling.

**Technical Specification of Mathematical Simulation Model**

*Differential equations*

The model is specified by a set of ordinary differential equations which are solved numerically using custom-made software developed by the authors. They are formed as follows and illustrated in Figure 1:

$$\begin{aligned} \frac{dX_{k,i,j}^1(t)}{dt} &= R\phi_{k,i,j} - \lambda_{k,i,j} X_{k,i,j}^1 - \mu X_{k,i,j}^1 \\ \frac{dX_{k,i,j}^2(t)}{dt} &= \lambda_{k,i,j} X_{k,i,j}^1 - (\sigma_2 + \mu) X_{k,i,j}^2 \\ \frac{dX_{k,i,j}^3(t)}{dt} &= \sigma_2 X_{k,i,j}^2 - (\sigma_3 + \mu) X_{k,i,j}^3 \\ \frac{dX_{k,i,j}^4(t)}{dt} &= (1 - a_{350}(t)) \sigma_3 X_{k,i,j}^3 - (\sigma_4 + \mu) X_{k,i,j}^4 \\ \frac{dX_{k,i,j}^5(t)}{dt} &= (1 - a_{200}(t)) \sigma_4 X_{k,i,j}^4 - (\sigma_5 + \mu) X_{k,i,j}^5 \\ \frac{dX_{k,i,j}^6(t)}{dt} &= \sigma_5 X_{k,i,j}^5 + -(\sigma_6 + \mu) X_{k,i,j}^6 \\ \frac{dX_{k,i,j}^7(t)}{dt} &= \sigma_6 X_{k,i,j}^6 + \sigma_8 X_{k,i,j}^8 - (\sigma_7 + \mu) X_{k,i,j}^7 \\ \frac{dX_{k,i,j}^8(t)}{dt} &= a_{350}(t) \sigma_3 X_{k,i,j}^3 + a_{200}(t) \sigma_4 X_{k,i,j}^4 - (\sigma_8 + \mu) X_{k,i,j}^8 \end{aligned}$$

The state variables are given by  $X_{k,i,j}^s(t)$ :  $t$  is the time elapsed in the simulation;  $s$  is the infection-status (1= susceptible; 2= acute infection; 3= latent infection with CD4>350; 4= latent infection with CD4 between 200 and 350; 5= pre-AIDS with CD4<200; 6=pre-AIDS with elevated viral load; 7= AIDS; 8=on ART),  $k$  is ‘type’ (1= men who sex with women; 2= women; 3=male bisexuals; 4=Men who have sex with men (MSM)),  $i$  is injecting equipment usage behaviour (1=does not use non-sterile equipment; 2= “rarely” uses non-sterile equipment; 3= “often” uses non-sterile equipment), and  $j$  is sexual behaviour (1=does not have unprotected sex; 2=has

“few” sex partners; 3=has “many” sex partners, including sex workers). In the description that follows, a dot (•) in the position of any of these indices indicates a sum across that index.

$\phi_{k,i,j}$  is the fraction of those starting injecting drugs of that type and behaviour;  $1/\sigma_s$  is the mean time spent in infection phase  $s$ ;  $\lambda_{k,i,j}$  is the force of infection for individuals of that type and behaviour;  $\mu$  is the rate of exiting the IDU population, and incorporates non-HIV related mortality ( $M$ ) and mean time spent injecting drugs ( $L$ ):  $\mu = M + 1/L$ .  $R$  is the rate of entry of the IDU population, and is set so as to maintain a constant population size, such that:  $R = \mu X_{\bullet,\bullet,\bullet}^7 + \sigma_6 X_{\bullet,\bullet,\bullet}^7 \cdot a_{350}(t)$  and  $a_{200}(t)$  are the proportion of individuals with CD4 cell count 350 and 200, respectively, that are initiated on treatment at that time.

The boundary conditions of the system are:

$$X_{k,i,j}^1(0) = (1 - seed)\phi_{k,i,j}N_0$$

$$X_{k,i,j}^3(0) = (seed)\phi_{k,i,j}N_0$$

$N_0$  is the size of IDU population at the start of the simulation and  $seed$  is the HIV prevalence at the start of the simulation in all parts of the population.

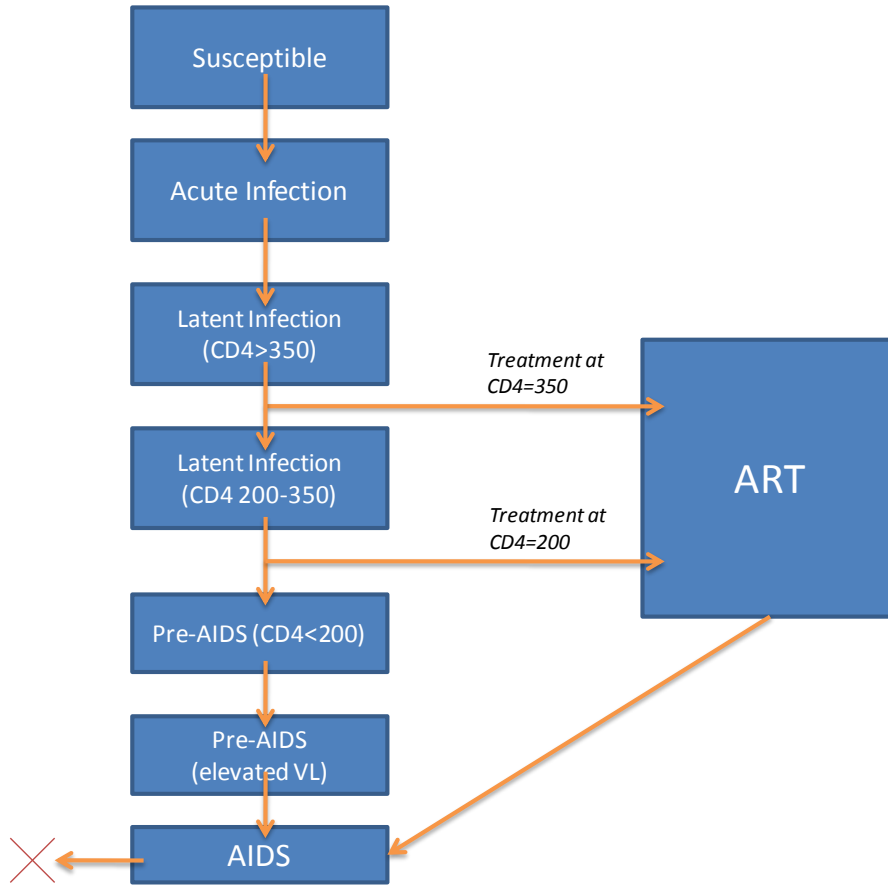

**Figure S1:** Flow diagram showing how the course of HIV infection is represented in the simulation model.

The structure of  $\phi_{k,i,j}$  is as follows:

$$\phi_{k,i,j} = K_k I_i J_{k,j}$$

Where  $K_k$  is the proportion of IDU of that type;  $I_i$  is the proportion of IDU with that injecting equipment usage behaviour; and,  $J_{k,j}$  is the proportion of IDU of that type in that sexual risk group.

### Calculation of Force of Infection

$\lambda_{k,i,j}$  is the force of infection for individuals of that type, injecting equipment usage behaviour and sexual behaviour. It combines the risk of HIV infection through use of contaminated injecting equipment ( $\lambda_i^{idu}$ ) and through sex ( $\lambda_{k,j}^{sex}$ ):  $\lambda_{k,i,j} = \lambda_i^{idu} + \lambda_{k,j}^{sex}$ .

The force of infection through using injecting equipment depends on, the pattern of usage of non-sterile equipment with respect to frequency of either leaving equipment where others may use it or intentionally sharing with others ( $\rho_{i,i'}^{idu}$ ), the infected-status and infectiousness of individuals with whom the equipment is shared ( $p_i^{idu}$ ), the fraction of shared equipment that is cleaned ( $\delta^{idu}$ ) and the efficacy of cleaning in removing the risk of HIV transmission ( $\alpha^{idu}$ ).

$$\lambda_i^{idu} = \sum_{i'} \rho_{i,i'}^{idu} p_{i'}^{idu}.$$

$$p_i^{idu} = \frac{\beta_0^{idu} (1 - \delta^{idu} \alpha^{idu}) \sum_{s=2}^6 \beta_s X_{\bullet,i,\bullet}^s}{\sum X_{\bullet,i,\bullet}^s}$$

$\beta_0^{idu}$  is the chance of HIV transmission per use of contaminated injecting equipment if the equipment was last used by an individual with latent HIV infection.  $\beta_s$  is the *relative* infectiousness of individuals in HIV stage  $s$ , compared to those with latent infection.

$\rho_{i,i'}^{idu}$  is the number of times equipment is shared with individual in usage group  $i$  with individuals in group  $i'$ . Following others (1), the extent to which sharing is random or assortative with respect to sharing behaviour is determined with a single mixing parameter ( $\varepsilon^{idu}$ ):

$$\rho_{i,i'}^{idu} = \left( (1 - \varepsilon^{idu}) \left( \frac{c_{i'} X_{\bullet,i',\bullet}}{\sum_{i'} c_{i'} X_{\bullet,i',\bullet}} \right) + \varepsilon^{idu} Q_{i,i'} \right) c_i$$

$c_i$  is the number of times injecting equipment is shared by those in that sharing behaviour group.

$Q_{x,y} = 1$  if  $x = y$ , and 0 otherwise.  $\varepsilon^{idu}$  would be closer to 1.0 if, for instance, in most cases of individuals using non-sterile equipment that equipment is found discarded by someone else;  $\varepsilon^{idu}$  would be closer to 0.0 if, in most cases, individuals using non-sterile equipment are using the equipment lent to them by someone they know and with whom they often inject.

The force of infection through sexual contact depends on, the pattern of sexual partnership formation with respect to type and sexual-risk behaviour ( $\rho_{k,j,k',j'}^{sex}$ ), the infection-status and stage of infection of the partner ( $p_{k,k',j,j'}^{sex}$ ), the fraction of sex acts in which a condom is used ( $\delta_{k,k',j,j'}^{sex}$ ) and the efficacy of condoms in reducing the risk of HIV transmission ( $\alpha^{sex}$ ).

$$\lambda_{k,j}^{sex} = \sum_{k',j'} \rho_{k,j,k',j'}^{sex} p_{k,k',j,j'}^{sex}$$

$$p_{k,k',j,j'}^{sex} = 1 - \left( 1 - \frac{\sum_{s=2}^6 \beta_0^{sex} \gamma_{k,k'} (1 - \delta_{k,k',j,j'}^{sex} \alpha^{sex}) \beta_s X_{k',\bullet,j'}^s}{X_{k',\bullet,j'}^\bullet} \right)^{w_{j,j'}}$$

$p_{k,k',j,j'}^{sex}$  itself depends on infected-status and infectiousness of partners and rate of sex acts in such a partnerships (number per partner per year:  $w_{j,j'}$ ). The rate of sex acts in a partnership is set at three levels: (i) rate of sex acts in partnerships between those that have “few” partnerships ( $w_{2,2}$ ), (ii) rate of sex acts in partnerships between those have “few” partnerships and those that have “many” partnerships ( $w_{2,3} = w_{3,2}$ ), and (iii) rate of sex acts in partnerships between those have “many” partnerships ( $w_{3,3}$ ). The frequency of condom use in partnerships is set at four levels according to the type partnership: (i) sex between a man and a woman who each have “few” partnerships ( $\delta_{1,2,2,2}^{sex} = \delta_{2,1,2,2}^{sex} = \delta_{3,2,2,2}^{sex} = \delta_{2,3,2,2}^{sex}$ ); (ii) sex between a man and a woman and either or both have “many” partnerships ( $\delta_{1,2,3,j'}^{sex} = \delta_{1,2,2,3}^{sex} = \delta_{2,1,3,j'}^{sex} = \delta_{2,1,2,3}^{sex}$ ); (iii) sex between two men and both have “few” partnerships ( $\delta_{3,3,2,2}^{sex} = \delta_{3,4,2,2}^{sex} = \delta_{4,3,2,2}^{sex} = \delta_{4,4,2,2}^{sex}$ ); and (iv) sex between two men and either or both have “many” partnerships

$$( \delta_{3,3,3,j'}^{sex} = \delta_{3,4,3,j'}^{sex} = \delta_{4,3,3,j'}^{sex} = \delta_{4,4,3,j'}^{sex} = \delta_{3,3,2,3}^{sex} = \delta_{3,4,2,3}^{sex} = \delta_{4,3,2,3}^{sex} = \delta_{4,4,2,3}^{sex} ).$$

$\beta_0^{sex}$  is the chance of HIV transmission per sex act if the sex act was with an individual with latent HIV infection.  $\gamma_{k,k'}$  is the relative chance of transmission in partnership between individuals of these two

types, relative to female-to-male chance of transmission: (female-to-male  $\gamma_{1,2}$ ; male-to-female  $\gamma_{2,1}$ ; MSM-to-Bisexual or Bisexual to MSM  $\gamma_{3,4} = \gamma_{4,3}$ ; Bisexual male-to-female  $\gamma_{2,3}$ ).

Mixing matrices are constructed for sex between men (including bisexual men) and women and for sex between MSM and bisexual men. The total number of sex partners per year is  $d_{k,j}$ , of which a proportion  $v_j$  are formed with other injecting drug users and a proportion of bisexual's partnerships ( $\eta$ ) are with women.

The distribution of men's partnerships across women in different groups:

$$\chi_{1,j,j'} = \left( (1 - \varepsilon^{sex}) \frac{v_{j'} d_{1,j'} X_{2,\bullet,j'}^\bullet}{\sum_{j'} v_{j'} d_{2,j'} X_{2,\bullet,\bullet}^\bullet} + \varepsilon^{sex} Q_{j,j'} \right)$$

The distribution of women's partnerships across men (including bisexual men) in different groups:

$$\chi_{2,j,j'} = \left( (1 - \varepsilon^{sex}) \frac{v_{j'} (d_{1,j'} X_{1,\bullet,j'}^\bullet + \eta d_{3,j'} X_{3,\bullet,j'}^\bullet)}{\sum_{j'} v_{j'} (d_{1,j'} X_{1,\bullet,\bullet}^\bullet + \eta d_{3,j'} X_{3,\bullet,\bullet}^\bullet)} + \varepsilon^{sex} Q_{j,j'} \right)$$

These two expressions need to 'balance' so that the number of each type partnership between men and women in different groups formed is consistent in the force of infection to men and to women. In the event of a discrepancy, the extent to which a balanced matrix reflects the original version for the men, is determined by  $\theta$ .

$$D_{q,jm,if} = \frac{(d_{1,j} X_{1,\bullet,\bullet}^\bullet + d_{3,j} X_{3,\bullet,\bullet}^\bullet) v_{jm} \chi_{1,jm,if}}{X_{2,\bullet,\bullet}^\bullet \chi_{2,if,jm} v_{if} d_{2,if}}$$

$$\chi_{1,j,j'} \rightarrow \chi_{1,j,j'} D_{q,jm,if}^{-(1-\theta)}$$

$$\chi_{2,j,j'} \rightarrow \chi_{2,j,j'} D_{q,if,jm}^\theta$$

$$\chi_{3,j,j'} = \chi_{4,j,j'} = (1 - \varepsilon^{sex}) \left( \frac{(1 - \eta) \nu_j d_{3,j'} X_{3,\bullet,j'}^\bullet + d_{4,j'} \nu_j X_{4,\bullet,j'}^\bullet}{\sum_{j'} (1 - \eta) \nu_j d_{3,j'} X_{3,\bullet,j'}^\bullet + d_{4,j'} \nu_j X_{4,\bullet,j'}^\bullet} \right) + \varepsilon^{sex} Q_{j,j'}$$

The fraction of womens' partnerships that are formed with bisexuals is:

$$m_j = \frac{\eta d_{3,j'} X_{3,\bullet,j'}^\bullet}{d_{1,j'} X_{1,\bullet,j'}^\bullet + \eta d_{3,j'} X_{3,\bullet,j'}^\bullet}.$$

The fraction of MSMs' partnership that are formed with with bisexuals is:

$$n_j = \frac{(1 - \eta) \nu_j d_{3,j'} X_{3,\bullet,j'}^\bullet}{(1 - \eta) \nu_j d_{3,j'} X_{3,\bullet,j'}^\bullet + d_{4,j'} \nu_j X_{4,\bullet,j'}^\bullet}.$$

The full mixing matrix is then defined as follows, with elements equal to zero otherwise.

$$\begin{aligned} \rho_{1,j,2,j'}^{sex} &= \nu_j d_{1,j} \chi_{1,j,j'} \\ \rho_{2,j,1,j'}^{sex} &= (1 - m_j) \nu_j d_{2,j} \chi_{2,j,j'} \\ \rho_{2,j,3,j'}^{sex} &= m_j \nu_j d_{2,j} \chi_{2,j,j'} \\ \rho_{3,j,2,j'}^{sex} &= \eta \nu_j d_{3,j} \chi_{1,j,j'} \\ \rho_{3,j,4,j'}^{sex} &= (1 - \eta_j) \nu_j d_{3,j} \chi_{3,j,j'} \\ \rho_{4,j,3,j'}^{sex} &= n_j \nu_j d_{4,j} \chi_{4,j,j'} \\ \rho_{4,j,4,j'}^{sex} &= (1 - n_j) \nu_j d_{4,j} \chi_{4,j,j'} \end{aligned}$$

### **Analytic Framework**

For this simulation model there are two sources of prior information: information on the model parameters, including details about HIV natural history and HIV-risk behaviour, and information on HIV prevalence. The Bayesian Melding procedure (2) combines these sources of information on the inputs and outputs, respectively. The information on prevalence is distinguished from the actual data on prevalence because it can be based on expert opinion or indirectly on data that is not perfectly comparable.



Following the procedure and notation proposed by Alkema *et al.* (3), we denote the simulation model described above as  $M$ , the model input parameters as  $\theta$  (including all the parameters listed in Table 1) and the model output (HIV prevalence over time in the general population) as  $\rho$ . That is,  $\rho = M(\theta)$ . We denote the direct priors (information on HIV prevalence rates) as  $p(\rho)$ . We allow this information to be in the form of intervals for HIV prevalence at certain times. In this way, the direct prior can only either support or refute a particular simulated epidemic curve. This is represented formally by:

$$p(\rho) \propto \prod_{t \in \Gamma} I_{V_t}(\rho_t)$$

Where  $\Gamma$  is the set of years for which there is prior knowledge,  $V_t$  is the specified interval for prevalence in year  $t$ , and  $I_A(x)$  is the indicator function (equals 1 if  $x \in A$  ( $x$  is included in  $A$ ), or 0 otherwise).

For each input model parameter, available information is summarised in the prior marginal distribution (for details see below). The prior density for each set of parameters is denoted  $p(\theta)$ . This translates to an induced prior on model outputs, which is denoted  $p^*(\rho)$ .

The two sources of prior information are combined to give a pooled prior  $\tilde{p}(\rho)$ :

$$\tilde{p}(\rho) \propto p^*(\rho) \prod_{t \in \Gamma} I_{V_t}(\rho_t)$$

Next, we denote the data on HIV prevalence as  $\mathbf{W}$ . The fundamental Bayesian relationship between the prior information, the data and the updated posterior information can be expressed as:

$$p(\rho|\mathbf{W}) \propto \tilde{p}(\rho) p(\mathbf{W}|\rho)$$

Since the model is not invertible, it is not possible to derive an analytic solution with which to calculate the posterior distributions. A standard 'Monte Carlo' technique is used to approximate this instead; a modified Sample-Importance-Resample algorithm (4). This consists of the following steps:

1. Generate a set of parameters by sampling from the prior distributions of each parameter:  $\theta^{(i)}$ . To increase efficiency, a stratified without-replacement sampling scheme is used, with appropriate correction for the weighting made throughout (5). Form the prior for this set of parameter values:  $p(\theta)$ .
2. Evaluate the model using this set of parameters:  $\rho^{(i)} = M(\theta^{(i)})$
3. Form the sampling weight for the run as the product of the likelihood and the pooled prior:  $\omega_i = p(\mathbf{W}|\rho^{(i)}) \tilde{p}(\rho^{(i)})$
4. Repeats steps 1-3,  $N$  times.

5. Re-sample from the discrete distributions of epidemic simulations  $Q$  times, with probability proportional to the sampling weights, to approximate the posterior distribution for the inputs.

The likelihood of the simulated epidemic given the prevalence data,  $p(\mathbf{W}|\boldsymbol{\rho})$ , is estimated assuming only binomial errors in the estimate and independence between samples (6):

$$p(\mathbf{W}|\boldsymbol{\rho}) \propto \prod_i \rho(t_i)^{y_i N_i} (1 - \rho(t_i))^{(1-y_i)N_i}$$

Where  $\rho(t)$  is the model HIV prevalence at time  $t$  and the  $i$ th observation is at time  $t_i$ , records a prevalence of  $y_i$  and is from a sample of size  $N_i$ .

In this process, the number of samples,  $N$ , must be large so that combinations of parameters are selected from all regions of the multi-dimensional parameter space. In experimental analyses, a value for  $N$  was found by examining how changes in model fits and conclusions changed with increasing values of  $N$ .

The posterior distribution for the inputs ( $p(\boldsymbol{\rho}|\mathbf{W})$ ) provides the baseline “fit” of the model to the observed epidemic. This is used to generate estimate of the course of HIV epidemic in the IDU population and associated bounds of uncertainty. The impact of interventions on the HIV epidemic is represented by modifying certain of the parameter values at a defined point in the simulation. To quantify the impact these changes would have on HIV incidence, the same ‘intervention manipulation’ is applied to each of the items in the posterior set, and the change in incidence is calculated relative to the corresponding baseline run. This generates a distribution of effect size, which reflects the uncertainty in the model specification/parameterisation, but not the uncertainty in the expected size of the intervention. The impact of alternative types of interventions and combinations of interventions are then explored scenario-wise systematically, as described in the main text.

## Parameter Values

The parameters in the model are in the following categories:

1. Parameters that define the natural history of HIV (survival, infectiousness).

These parameters are evaluated from the general scientific literature and generalised across all settings: values are provided in Table 1. For reasons of computational efficiency, but with the exception of  $\beta_0^{idu}$  and  $\beta_0^{sex}$ , the uncertainty in these parameter values is not reflected in the estimates of uncertainty of the intervention impact.

2. Parameters that describe the basic demography of IDU populations (population size, mortality rate).

These parameters are specific to each setting but are not using in the model ‘fitting’ procedure (defined below) because they are non-informative. However, in the estimates of projections of incidence rates, uncertainty in the estimated size of the population is captured (7).

3. Parameters that describe the distribution of risk in the population.

These parameters are specific to each setting. Their value is estimated in Bayesian framework using prior information from a literature review and HIV prevalence estimates (see Tables that follow). For each parameter, a prior distribution is defined reflecting uncertainty in the information about that parameter – including, but not limited to, uncertainty arising through random sampling errors.

4. Parameters that describe the impact of structural changes and interventions.

These parameters are specific to each setting and characterise how certain structural changes could potentially affect proximate determinants of risk and influence the course of the epidemic. These are evaluated as follows:

*Odessa:* The potential impact of changing the policing practices was quantified by examining the relationship between key indicator of risk behaviour in the last 30 days (‘using preloaded syringes’, ‘front/back-loading a syringe’ and ‘receptive needle sharing’) and reporting ever being beaten by police, among a study of 600 IDU in Odessa in 2004-7 (8). The impact of police beatings on the epidemic was thus estimated by measuring the extent to which the overall frequency of each type of risk could be attributed to ever being beaten. In Odessa, 24% of IDU reported ever being by police and, for instance, 22% of those that had also reported using preloaded syringes in the last years compared to 6% of those who had never been beaten. It was thus estimated that without police beatings, there would be a 29% reduction in use of non-sterile equipment, on the basis that, compared to the population overall, individuals who had never been beaten were, on average, 29% less likely to have report each form of risky exposure. The analysis was repeated using data from the same study conducted in the cities of Makeevka and Kiev. In these settings, the frequency of

reporting ever being beaten for police was higher (Makeevka: 46%; Kiev 55%) but the individual-level association being beaten and risk behaviour was weaker. The overall estimated reduction in risk associated with removal of police beatings in these settings was 16% for Makeevka and 10% for Kiev.

*Karachi:* The impact on the epidemic of non-injecting drug users transitioning to injecting drugs was explored. Assuming that between 15% and 30% of all drug users are currently injecting users (9), and that there are approximately 9000 IDU in Karachi (see Tables below), it was estimated that there would be between 30,000 and 60,000 total drug users in Karachi. The model simulated that, in one year, 8%, 10% or 12% of non-injecting drug users, become injecting-users. This corresponds to 3600, 4500 or 5400 individuals transitioning to the IDU population.

*Assumed Efficacy of OST/NEP Interventions in Both Settings:*

**Needle Exchange Programmes:** Based on a review by Wodak and Cooney (2006) (10), we assume that individuals in contact with NEP, on average, reduce the rate of using non-sterile equipment by 50%. No effect on sexual risk behaviour is assumed to result from contact with NEP.

**Opioid Substitution Treatment:** We assume that availability of OST reduces injection frequency and needle sharing by 50%, based on a range of observational studies indicating reductions in the rate of receptive needle sharing between 33 and 67% (11-14). This range is considered to capture the effects of drop-out from programmes, which can impair the efficacy compared with perfection retention of those on treatment (15, 16). Effectiveness of methadone and buprenorphine is assumed equivalent, since studies show no significant differences. Although, some studies show reductions in the number of sex partners and/or increases in condom use associated with methadone maintenance, it is not clear that any effect is substantial or maintained, and here no effect on sexual behaviour of OST is assumed.

| Parameter                                                                                                           | Symbol                        | Value     | Source/Comments                                                    |
|---------------------------------------------------------------------------------------------------------------------|-------------------------------|-----------|--------------------------------------------------------------------|
| Relative rate of HIV transmission per sex act: female-to-male (vs. female-to-male).                                 | $\gamma_{1,2}$                | 1         | Definition.                                                        |
| Relative rate of HIV transmission per sex act: male-to-female vs. (vs. female-to-male).                             | $\gamma_{2,1}$                | 2         | (17)                                                               |
| Relative rate of HIV transmission per sex act: male-to-male (vs. female-to-male).                                   | $\gamma_{3,4} = \gamma_{4,3}$ | 10        | (18)                                                               |
| Mean duration of acute phase infection.                                                                             | $1/\sigma_2$                  | 3 months  | (19)                                                               |
| Mean interval between end of acute infection and CD4=350                                                            | $1/\sigma_3$                  | 4.55      | (20)                                                               |
| Mean interval between CD4=350 and CD4=200                                                                           | $1/\sigma_4$                  | 4.6       | (19, 20)                                                           |
| Mean interval between CD4=200 and elevation in viral load                                                           | $1/\sigma_5$                  | 1.1       | (Fitted to provide consistency between (20), (21) and (19))        |
| Mean interval with elevated viral load with pre-AIDS                                                                | $1/\sigma_6$                  | 10 months | (19)                                                               |
| Mean interval with AIDS before death                                                                                | $1/\sigma_7$                  | 9 months  | (19)                                                               |
| Mean duration of viral suppression of ART.                                                                          | $1/\sigma_8$                  | 7.5 years | (22)                                                               |
| Average transmission rate of HIV per use of non-sterile equipment (if last person to use had latent HIV infection). | $\beta_0^{idu}$               | ~0.0085   | Uncertainty is reflected in estimates of intervention impact. (17) |
| Average transmission rate of HIV per sex act (if partners had latent HIV infection).                                | $\beta_0^{sex}$               | ~0.0038   | Uncertainty is reflected in estimates of intervention impact. (23) |
| Relative infectiousness of individuals in acute phase infection (vs. latent infection).                             | $\beta_2$                     | 27        | (19)                                                               |
| Relative infectiousness of individuals in latent phase infection (vs. latent infection).                            | $\beta_3$                     | 1         | Definition.                                                        |
| Relative infectiousness of individuals in pre-AIDS phase infection (vs. latent infection).                          | $\beta_4$                     | 7         | (19)                                                               |
| Relative infectiousness of individuals in AIDS phase infection (vs. latent infection).                              | $\beta_5$                     | 0         | (19)                                                               |
| Relative infectiousness of virally-suppressed individuals on ART (vs. latent infection).                            | $\beta_6$                     | 0.08      | (24)                                                               |

**Table S1:** HIV natural history parameters that do not vary between settings.

| ODESSA, UKRAINE  |                 |                   |                                           | Distribution of prior |          |       |       |       |                                                                                                                                                                                      |
|------------------|-----------------|-------------------|-------------------------------------------|-----------------------|----------|-------|-------|-------|--------------------------------------------------------------------------------------------------------------------------------------------------------------------------------------|
| Parameter Number | Parameter Name  | Symbol            | Description                               | Estimate              | Shape    | "a"   | "b"   | "c"   | Comments                                                                                                                                                                             |
| 1                | IDUPop          | $N_0$             | Number of IDU.                            | 16268                 | Triangle | 15120 | 17100 | 16268 | Median and lower and upper bounds of estimates of IDU population size in Odessa (25).                                                                                                |
| 2                | MortRate        | $M$               | Mortality rate of IDU.                    | 0.04                  | Fixed    | -99   | -99   | -99   | Survey of IDU in Odessa 2001, as reported in Vickerman et al (26).                                                                                                                   |
| 3                | DurIDU          | $L$               | Mean duration (years) spent as IDU.       | 35.00                 | Uniform  | 20    | 50    | -99   | Based on observation of 5% of IDU in Odessa started in last year (Vickerman et al. STD 2006) and 2% started in last year in study of Odessa IDUs (n=600) conducted from 2004-07 (8). |
| 4                | Pr_IDU_IsMen    | $K_1 + K_2 + K_3$ | Fraction of IDU that are men.             | 0.70                  | Triangle | 0.65  | 0.8   | 0.7   | Survey of IDU in Odessa 2001, as reported in Vickerman et al (26).and range from review of other studies in Ukraine.                                                                 |
| 5                | Pr_IDURisk_None | $I_1$             | Fraction of IDU that never share needles. | 0.53                  | Uniform  | 0.488 | 0.568 | 0.528 | Estimate and 95% confidence interval limits from study of Odessa IDUs (n=600) conducted from 2004-07 (8).                                                                            |

|    |                     |                     |                                                                              |        |          |       |       |       |                                                                                                                                                                |
|----|---------------------|---------------------|------------------------------------------------------------------------------|--------|----------|-------|-------|-------|----------------------------------------------------------------------------------------------------------------------------------------------------------------|
| 6  | Pr_IDURisk_High     | $I_3 / (I_2 + I_3)$ | Fraction of IDU that ever share needles, that do so often.                   | 0.24   | Uniform  | 0.19  | 0.29  | 0.24  | Proportion that have shared equipment in last month: estimate and 95% confidence interval limits from study of Odessa IDUs (n=600) conducted from 2004-07 (8). |
| 7  | c_low               | $C_1$               | Number of needle-sharing partners in last year, for those that share rarely. | 12.00  | Uniform  | 1     | 12    | -99   | Between once per year and once per month.                                                                                                                      |
| 8  | c_high              | $C_2$               | Number of needle-sharing partners in last year, for those that share often.  | 107.00 | Triangle | 50    | 163   | 107   | Based on number of times shared needles in last month (among those who shared in last month) was 8.9 (4.3-13.6). (8)                                           |
| 9  | Epsi_IDU            | $\epsilon^{idu}$    | Degree of like-with-like sharing of needles between IDUs.                    | 0.60   | Uniform  | 0.3   | 0.9   | -99   | Limited studies suggest weak assortative mixing (27).                                                                                                          |
| 10 | PrCleaned           | $\delta^{idu}$      | Fraction of shared needles that are cleaned before re-use.                   | 0.77   | Triangle | 0.654 | 0.878 | 0.766 | Estimate and 95% confidence interval limits from study of Odessa IDUs (n=600) conducted from 2004-07 (8).                                                      |
| 11 | CleaningEfficacy    | $\alpha^{idu}$      | Efficacy of cleaning.                                                        | 0.00   | Fixed    | -99   | -99   | -99   | Assume that 'cleaning' has no effect in reducing chance of HIV acquisition.                                                                                    |
| 12 | Pr_SexRisk_None_Men | $J_{1,1}$           | Fraction of male IDU that never have sex.                                    | 0.23   | Triangle | 0.192 | 0.273 | 0.233 | Estimate and 95% confidence interval                                                                                                                           |

|    |                       |                                 |                                                                   |      |          |       |        |        |                                                                                                                                                                                                                                   |
|----|-----------------------|---------------------------------|-------------------------------------------------------------------|------|----------|-------|--------|--------|-----------------------------------------------------------------------------------------------------------------------------------------------------------------------------------------------------------------------------------|
|    |                       |                                 |                                                                   |      |          |       |        |        | limits for fraction of men who did not have sex in last 30 days (8).                                                                                                                                                              |
| 13 | Pr_SexRisk_High_Men   | $J_{1,3}/(J_{1,2} + J_{1,3})$   | Fraction of male IDU that have sex, that have "many" partners.    | 0.37 | Triangle | 0.316 | 0.421  | 0.368  | Estimate and 95% confidence interval limits of fraction of men reporting more than 1 partner in last 30 days (By Design - "Many" partners corresponds to upper 30th percentile of number of sexual partners in last 30 days) (8). |
| 14 | Pr_SexRisk_None_Women | $J_{2,1}$                       | Fraction of female IDU that never have sex.                       | 0.27 | Triangle | 0.208 | 0.34   | 0.274  | Estimate and 95% confidence interval limits of fraction of women who didn't have sex in last 30 days (8).                                                                                                                         |
| 15 | Pr_SexRisk_High_Women | $J_{2,3}/(J_{2,2} + J_{2,3})$   | Fraction of female IDU that have sex, that have "many" partners.  | 0.23 | Triangle | 0.115 | 0.301  | 0.228  | By Design - "Many" partners corresponds to upper 30th percentile of number of sexual partners in last 30 days (8).                                                                                                                |
| 16 | PrMenIDU_MSM          | $(K_3 + K_4)/(K_1 + K_3 + K_4)$ | Fraction of IDU men that have sex with men only or men and women. | 0.01 | Triangle | 0.003 | 0.0258 | 0.0144 | Reported sexual orientatio as 'gay' or 'bisexual'. (8).                                                                                                                                                                           |
| 17 | Pr_SexRisk_High_MSM   | $J_{3,3} = J_{4,3}$             | Fraction of MSM that have "many" partners                         | 0.99 | Triangle | 0.398 | 0.99   | 0.99   | By Design - "Many" partners corresponds to upper 30th percentile of number                                                                                                                                                        |



|           |              |                     |                                                                         |       |          |      |       |      |                                                                                                                                                                                        |
|-----------|--------------|---------------------|-------------------------------------------------------------------------|-------|----------|------|-------|------|----------------------------------------------------------------------------------------------------------------------------------------------------------------------------------------|
|           |              |                     |                                                                         |       |          |      |       |      | of sexual partners in last 30 days (8).                                                                                                                                                |
| <b>18</b> | d_low_Men    | $d_{1,2}$           | Number of sexual partners per year for men that have "few" partners.    | 2.78  | Triangle | 1    | 6     | 2.78 | Imputed from observation of Mean # of sexual partners in past month for ALL men equal to 1.603 (1.386 - 1.820) . (8)                                                                   |
| <b>19</b> | d_high_Men   | $d_{1,3}$           | Number of sexual partners per year for men that have "many" partners.   | 47.50 | Triangle | 40.6 | 54.3  | 47.5 | Based on mean number of sexual partners in last month for men with "many" sexual partners of 3.958 (3.387 - 4.529) (8).                                                                |
| <b>20</b> | d_low_Women  | $d_{2,2}$           | Number of sexual partners per year for women that have "few" partners.  | 2.40  | Triangle | 1    | 6     | 2.40 | Imputed from observation of Mean # of sexual partners in past month for ALL women equal to 1.640 (0.973 - 2.307). (8) (Min 1 partner per year, by definition; Maxium set arbitrarily). |
| <b>21</b> | d_high_Women | $d_{2,3}$           | Number of sexual partners per year for women that have "many" partners. | 78.20 | Triangle | 34.1 | 122.3 | 78.2 | Based on mean number of sexual partners in last month for women with "many" sexual partners of 6.517 (2.840 - 10.195) (8).                                                             |
| <b>22</b> | d_low_MSM    | $d_{3,2} = d_{4,2}$ | Number of sexual partners per year for MSM that have "few" partners.    | 2.78  | Triangle | 1    | 6     | 2.78 | (Very few men in this category in the data; assume follows same                                                                                                                        |

|    |                   |                     |                                                                                     |       |          |       |       |       |                                                                                                                                      |
|----|-------------------|---------------------|-------------------------------------------------------------------------------------|-------|----------|-------|-------|-------|--------------------------------------------------------------------------------------------------------------------------------------|
|    |                   |                     |                                                                                     |       |          |       |       |       | distribution as men who have sex with only women).                                                                                   |
| 23 | d_high_MSM        | $d_{3,3} = d_{4,3}$ | Number of sexual partners per year for MSM that have "many" partners.               | 63.00 | Triangle | 5.6   | 131.6 | 63    | Based on mean # of sexual partners in last month for gay and bisexual men with "many" sexual partners of 5.250 (0.469 - 10.969) (8). |
| 24 | Epsi_Sex          | $\epsilon^{sex}$    | Degree of like-with-like formation of sexual partnerships.                          | 0.60  | Uniform  | 0.3   | 0.9   | -99   | Limited studies suggest weak assortative mixing (27).                                                                                |
| 25 | PrMSMSexWithWomen | $\eta$              | Fraction of MSM that also have sex with women.                                      | 0.50  | Triangle | 0.09  | 0.9   | 0.5   | Fraction of bisexual men among bisexual and gay men (8).                                                                             |
| 26 | PtrsAreIDU_low    | $\nu_2$             | Fraction of IDU's sex partners that are also IDUs (for those with "few" partners).  | 0.58  | Triangle | 0.526 | 0.638 | 0.582 | Fraction of IDUs sex partners that were also IDUs in past month among IDUs with "few" partners (8).                                  |
| 27 | PtrsAreIDU_high   | $\nu_3$             | Fraction of IDU's sex partners that are also IDUs (for those with "many" partners). | 0.38  | Triangle | 0.311 | 0.441 | 0.376 | Fraction of IDU sex partners among IDUs with "many" sex partners (8).                                                                |
| 28 | theta             | $\theta$            | Extent to which partnership formation is determined by men.                         | 0.5   | Uniform  | 0.30  | 0.70  | -99   | Cannot be directly estimated from data but shown to have potentially important influence of epidemic spread (28).                    |

|    |                        |                                                                                                                                                                                                                        |                                                                                                                                            |       |          |       |       |       |                                                                                                                                       |
|----|------------------------|------------------------------------------------------------------------------------------------------------------------------------------------------------------------------------------------------------------------|--------------------------------------------------------------------------------------------------------------------------------------------|-------|----------|-------|-------|-------|---------------------------------------------------------------------------------------------------------------------------------------|
| 29 | RateOfSexActs_lowlow   | $w_{2,2}$                                                                                                                                                                                                              | Number of sex acts per partnership per year in partnerships between those that have "few" partnerships.                                    | 56.00 | Uniform  | 16    | 96    | -99   | Based on approx 1-3 sex acts per week in regular for 4-8 months partnerships (ref).                                                   |
| 30 | RateOfSexActs_highlow  | $w_{3,3}$                                                                                                                                                                                                              | Number of sex acts per partnership per year in partnerships between those have "few" partnerships and those that have "many" partnerships. | 56.00 | Uniform  | 16    | 96    | -99   | Based on approx 1-3 sex acts per week in regular for 4-8 months partnerships.                                                         |
| 31 | RateOfSexActs_highhigh | $w_{3,3}$                                                                                                                                                                                                              | Number of sex acts per partnership per year in partnerships between those that have "many" partnerships.                                   | 3.00  | Uniform  | 1     | 5     | -99   | Based on 1-5 sex acts in total in short duration sexual partnerships and in commercial sex.                                           |
| 32 | PrCondomUseMF_low      | $\delta_{1,2,2,2}^{sex} = \delta_{2,1,2,2}^{sex} = \delta_{3,2,2,2}^{sex} = \delta_{2,3,2,2}^{sex}$                                                                                                                    | Fraction of sex acts condom used in sex between a man and a woman who each have "few" partnerships.                                        | 0.35  | Triangle | 0.298 | 0.404 | 0.351 | Fraction of protected vaginal/anal sex acts in last 30 days among heterosexuals who have "few" partners (8).                          |
| 33 | PrCondomUseMF_high     | $\delta_{1,2,3,j'}^{sex} = \delta_{1,2,2,3}^{sex} = \delta_{2,1,3,j'}^{sex} = \delta_{2,1,2,3}^{sex}$                                                                                                                  | Fraction of sex acts condom used in sex between a man and a woman and either or both have "many" partnerships.                             | 0.65  | Triangle | 0.575 | 0.721 | 0.648 | Fraction of protected vag/anal sex acts in last 30 days among heterosexuals who have "many" partners (8).                             |
| 34 | PrCondomUseMM_low      | $\delta_{3,3,2,2}^{sex} = \delta_{3,4,2,2}^{sex} = \delta_{4,3,2,2}^{sex} = \delta_{4,4,2,2}^{sex}$                                                                                                                    | Fraction of sex acts condom used in sex between two men and both have "few" partnerships.                                                  | 0.35  | Triangle | 0.298 | 0.404 | 0.351 | Assume distributions for male-female sex.                                                                                             |
| 35 | PrCondomUseMM_high     | $\delta_{3,3,3,j'}^{sex} = \delta_{3,4,3,j'}^{sex} = \delta_{4,3,3,j'}^{sex}$<br>$= \delta_{4,4,3,j'}^{sex} = \delta_{3,3,2,3'}^{sex} = \delta_{3,4,2,3}^{sex}$<br>$= \delta_{4,3,2,3}^{sex} = \delta_{4,4,2,3}^{sex}$ | Fraction of sex acts condom used in sex between two men and either or both have "many" partnerships.                                       | 0.65  | Triangle | 0.575 | 0.721 | 0.648 | Assume distributions for male-female sex.                                                                                             |
| 36 | CondomEfficacy         | $\alpha^{sex}$                                                                                                                                                                                                         | Efficacy of condoms (as used).                                                                                                             | 0.78  | Uniform  | 0.60  | 0.95  | -99   | Range from lowest estimate in pooled meta-analysis to highest estimate for perfectly consistent use. (29) Mean is mid-point of range. |

|    |           |                 |                                                                                      |        |            |        |        |     |                                                                                                                                                               |
|----|-----------|-----------------|--------------------------------------------------------------------------------------|--------|------------|--------|--------|-----|---------------------------------------------------------------------------------------------------------------------------------------------------------------|
| 37 | Beta0_Sex | $\beta_0^{sex}$ | Average transmission rate of HIV per sex act (in latent infection phase).            | 0.0038 | Log-Normal | -5.573 | 4.558  | -99 | Distribution chosen to coincide with point estimate and 95% confidence intervals of meta-analysis of rates of HIV transmission ([95% CI 0.0013-0.0110]) (17). |
| 38 | Beta0_IDU | $\beta_0^{idu}$ | Average transmission rate of HIV per needle-sharing act (in latent infection phase). | 0.0085 | Uniform    | 0.0029 | 0.0141 | -99 | (23)                                                                                                                                                          |

**Table S2:** Parameters for used in model “fitting” for Odessa.

Distribution shapes (and parameterisation) are as follows: *Uniform* ("a" is lower limit; "b" is upper limit); *Triangle* ("a" is lower limit; "b" is upper limit; "c" is mode); *Normal* ("a" is mean; "b" is standard deviation) and *Log-Normal* ("a" is mean; "b" is standard deviation). Note that -99 is a dummy for “N/A”.

| KARACHI, PAKISTAN |                 |                   |                                           | Distribution of prior |          |      |       |       |                                                                                                                                                                                                             |
|-------------------|-----------------|-------------------|-------------------------------------------|-----------------------|----------|------|-------|-------|-------------------------------------------------------------------------------------------------------------------------------------------------------------------------------------------------------------|
| Parameter Number  | Parameter Name  | Symbol            | Description                               | Estimate              | Shape    | "a"  | "b"   | "c"   | Comments                                                                                                                                                                                                    |
| 1                 | IDUPop          | $N_0$             | Number of IDU.                            | 9000                  | Triangle | 7200 | 10400 | 9000  | HIV Second Generation Surveillance in Pakistan; National Report Round II; 2006-2007; National AIDS Control Program 2007.                                                                                    |
| 2                 | MortRate        | $M$               | Mortality rate of IDU.                    | 0.01                  | Fixed    | -99  | -99   | -99   | 1% per year for HIV-IDU (30).                                                                                                                                                                               |
| 3                 | DurIDU          | $L$               | Mean duration (years) spent as IDU.       | 9.7                   | Uniform  | 4.4  | 15    | -99   | Upper limit based on average time since first injection: 4.4 years in 2003 (31); Upper limit based on 13.4% having started to inject within two years (32). Estimate is mid-point between these two limits. |
| 4                 | Pr_IDU_IsMen    | $K_1 + K_2 + K_3$ | Fraction of IDU that are men.             | 0.975                 | Uniform  | 0.95 | 1     | -99   | All literature review for Karachi suggests more than 95% of IDU are men.                                                                                                                                    |
| 5                 | Pr_IDURisk_None | $I_1$             | Fraction of IDU that never share needles. | 0.205                 | Triangle | 0.06 | 0.82  | 0.205 | Compliment of the fraction of IDU in Karachi reporting "ever" shared ((31) and HIV Second                                                                                                                   |

|    |                 |                     |                                                                              |       |          |       |       |       |                                                                                                                                                                                                       |
|----|-----------------|---------------------|------------------------------------------------------------------------------|-------|----------|-------|-------|-------|-------------------------------------------------------------------------------------------------------------------------------------------------------------------------------------------------------|
|    |                 |                     |                                                                              |       |          |       |       |       | Generation Surveillance in Pakistan; National Report Round II; 2006-2007; National AIDS Control Program 2007.                                                                                         |
| 6  | Pr_IDURisk_High | $I_3 / (I_2 + I_3)$ | Fraction of IDU that ever share needles, that do so often.                   | 0.226 | Triangle | 0.187 | 1     | 0.226 | Fraction of IDUs in Karachi that shared, that shared at "last" injection(32) . Range from minimum and maximum fractions reporting sharing in last week (any city in Pakistan) from literature review. |
| 7  | c_low           | $C_1$               | Number of needle-sharing partners in last year, for those that share rarely. | 27    | Uniform  | 2     | 52    | -99   | No direct data. Values imply rate of between once every six months and once a week.                                                                                                                   |
| 8  | c_high          | $C_2$               | Number of needle-sharing partners in last year, for those that share often.  | 104   | Uniform  | 52    | 156   | -99   | No direct data. Values imply rate of between once a week and three times a week.                                                                                                                      |
| 9  | Epsi_IDU        | $\epsilon^{idu}$    | Degree of like-with-like sharing of needles between IDUs.                    | 0.6   | Uniform  | 0.3   | 0.9   | -99   | Limited studies suggest weak assortative mixing (27).                                                                                                                                                 |
| 10 | PrCleaned       | $\delta^{idu}$      | Fraction of shared needles that are cleaned before re-use.                   | 0.946 | Triangle | 0.01  | 0.847 | 0.793 | In Karachi IDUs in 2004, 94.6% cleaned their syringe at last injection (32), but                                                                                                                      |

|    |                     |                               |                                                                |      |          |      |      |      |                                                                                                                                                                                                                                                                     |
|----|---------------------|-------------------------------|----------------------------------------------------------------|------|----------|------|------|------|---------------------------------------------------------------------------------------------------------------------------------------------------------------------------------------------------------------------------------------------------------------------|
|    |                     |                               |                                                                |      |          |      |      |      | the method of cleaning was not given.                                                                                                                                                                                                                               |
| 11 | CleaningEfficacy    | $\alpha^{idu}$                | Efficacy of cleaning.                                          | 0.00 | Fixed    | -99  | -99  | -99  | Assume that 'cleaning' has no effect in reducing chance of HIV acquisition.                                                                                                                                                                                         |
| 12 | Pr_SexRisk_None_Men | $J_{1,1}$                     | Fraction of male IDU that never have sex.                      | 0.16 | Triangle | 0.10 | 0.25 | 0.16 | 16% of male IDUs in a multi-site surveillance study in Pakistan had never had sex in 2006 (HIV Second Generation Surveillance in Pakistan; National Report Round II; 2006-2007; National AIDS Control Program 2007).                                                |
| 13 | Pr_SexRisk_High_Men | $J_{1,3}/(J_{1,2} + J_{1,3})$ | Fraction of male IDU that have sex, that have "many" partners. | 0.24 | Triangle | 0.1  | 0.5  | 0.24 | 24% report having sex with female sex worker in the last months; min and max are lowest and highest for IDUs in other cities in Pakistan (HIV Second Generation Surveillance in Pakistan; National Report Round II; 2006-2007; National AIDS Control Program 2007). |

|    |                       |                                 |                                                                      |      |          |      |     |      |                                                                                                                                                                                                                                                             |
|----|-----------------------|---------------------------------|----------------------------------------------------------------------|------|----------|------|-----|------|-------------------------------------------------------------------------------------------------------------------------------------------------------------------------------------------------------------------------------------------------------------|
| 14 | Pr_SexRisk_None_Women | $J_{2,1}$                       | Fraction of female IDU that never have sex.                          | 0.05 | Fixed    | -99  | -99 | -99  | Assume most women sexually active.                                                                                                                                                                                                                          |
| 15 | Pr_SexRisk_High_Women | $J_{2,3}/(J_{2,2} + J_{2,3})$   | Fraction of female IDU that have sex, that have "many" partners.     | 0.98 | Fixed    | -99  | -99 | -99  | In 2006, estimate of number of FSWs in Karachi was 13,150, of whom 0.7%-3.0% injected drugs - equivalent to 5% of IDU population (HIV Second Generation Surveillance in Pakistan; National Report Round II; 2006-2007; National AIDS Control Program 2007). |
| 16 | PrMenIDU_MSM          | $(K_3 + K_4)/(K_1 + K_3 + K_4)$ | Fraction of IDU men that have sex with men only or men and women.    | 0.41 | Triangle | 0.07 | 0.5 | 0.41 | 41.2% of male IDUs in Karachi had sex with male sex workers or hijras in last 6 month (32). Range is min and max among male IDU reporting sex with men in any Pakistan city (33) (refs).                                                                    |
| 17 | Pr_SexRisk_High_MSM   | $J_{3,3} = J_{4,3}$             | Fraction of MSM that have "many" partners                            | 0.24 | Triangle | 0.1  | 0.5 | 0.24 | Assume same prior for risk distribution as for other men.                                                                                                                                                                                                   |
| 18 | d_low_Men             | $d_{1,2}$                       | Number of sexual partners per year for men that have "few" partners. | 0.3  | Uniform  | 0.1  | 0.5 | -99  | Range is from 1 partners for 10 years to partners for 2 year (corresponds to men who do not buy sex).                                                                                                                                                       |



|           |              |                     |                                                                         |     |          |     |     |     |                                                                                                                                                                                                                                                               |
|-----------|--------------|---------------------|-------------------------------------------------------------------------|-----|----------|-----|-----|-----|---------------------------------------------------------------------------------------------------------------------------------------------------------------------------------------------------------------------------------------------------------------|
| <b>19</b> | d_high_Men   | $d_{1,3}$           | Number of sexual partners per year for men that have "many" partners.   | 13  | Uniform  | 2   | 24  | -99 | Range is from 2 partners per year to two partner per month (corresponds to men who buy sex).                                                                                                                                                                  |
| <b>20</b> | d_low_Women  | $d_{2,2}$           | Number of sexual partners per year for women that have "few" partners.  | 0.3 | Uniform  | 0.1 | 0.5 | -99 | Range is from 1 partner for 10 years to partners for 2 year (corresponds to women).                                                                                                                                                                           |
| <b>21</b> | d_high_Women | $d_{2,3}$           | Number of sexual partners per year for women that have "many" partners. | 348 | Triangle | 200 | 500 | 348 | Corresponds to women that sell sex; and female sex workers from Karachi reported 29 clients/mo in 2007m equivalent to 348 per year (HIV Second Generation Surveillance in Pakistan; National Report Round II; 2006-2007; National AIDS Control Program 2007.) |
| <b>22</b> | d_low_MSM    | $d_{3,2} = d_{4,2}$ | Number of sexual partners per year for MSM that have "few" partners.    | 0.3 | Uniform  | 0.1 | 0.5 | -99 | Range is from 1 partners for 10 years to partners for 2 year (corresponds to married men).                                                                                                                                                                    |
| <b>23</b> | d_high_MSM   | $d_{3,3} = d_{4,3}$ | Number of sexual partners per year for MSM that have "many" partners.   | 300 | Uniform  | 100 | 400 | -99 | Male sex workers and Hijras in Karachi had 25 male sex partners/mo, corresponding to 300 per year (HIV Second                                                                                                                                                 |

|    |                   |                  |                                                                                     |      |         |      |      |     |                                                                                                                                                               |
|----|-------------------|------------------|-------------------------------------------------------------------------------------|------|---------|------|------|-----|---------------------------------------------------------------------------------------------------------------------------------------------------------------|
|    |                   |                  |                                                                                     |      |         |      |      |     | Generation Surveillance in Pakistan; National Report Round II; 2006-2007; National AIDS Control Program 2007).                                                |
| 24 | Epsi_Sex          | $\epsilon^{sex}$ | Degree of like-with-like formation of sexual partnerships.                          | 0.6  | Uniform | 0.3  | 0.9  | -99 | Limited studies suggest weak assortative mixing (27).                                                                                                         |
| 25 | PrMSMSexWithWomen | $\eta$           | Fraction of MSM that also have sex with women.                                      | 0.75 | Uniform | 0.5  | 0.99 | -99 | Between half and all of those have sex with men also have sex with women.                                                                                     |
| 26 | PtrsAreIDU_low    | $\nu_2$          | Fraction of IDU's sex partners that are also IDUs (for those with "few" partners).  | 0.05 | Uniform | 0.01 | 0.09 | -99 | Assumed to be low given small numbers of women IDU, frequency of male IDU reporting sex with sex worker, and low proportion of sex workers than inject drugs. |
| 27 | PtrsAreIDU_high   | $\nu_3$          | Fraction of IDU's sex partners that are also IDUs (for those with "many" partners). | 0.05 | Uniform | 0.01 | 0.09 | -99 | Assumed to be low given small numbers of women IDU, frequency of male IDU reporting sex with sex worker, and low proportion of sex workers than inject drugs. |
| 28 | theta             | $\theta$         | Extent to which partnership formation is determined by men.                         | 0.05 | Uniform | 0.3  | 0.7  | -99 | Cannot be directly estimated from data                                                                                                                        |

|    |                        |                                                                                                       |                                                                                                                                            |       |          |       |       |       |                                                                                                                                                                                                                                     |
|----|------------------------|-------------------------------------------------------------------------------------------------------|--------------------------------------------------------------------------------------------------------------------------------------------|-------|----------|-------|-------|-------|-------------------------------------------------------------------------------------------------------------------------------------------------------------------------------------------------------------------------------------|
|    |                        |                                                                                                       |                                                                                                                                            |       |          |       |       |       | but shown to have potentially important influence of epidemic spread [25].                                                                                                                                                          |
| 29 | RateOfSexActs_lowlow   | $w_{2,2}$                                                                                             | Number of sex acts per partnership per year in partnerships between those that have “few” partnerships.                                    | 150   | Uniform  | 100   | 200   | -99   | Based on approx 2-4 sex acts per week in regular partnerships.                                                                                                                                                                      |
| 30 | RateOfSexActs_highlow  | $w_{3,3}$                                                                                             | Number of sex acts per partnership per year in partnerships between those have “few” partnerships and those that have “many” partnerships. | 10    | Uniform  | 5     | 15    | -99   | Based on 5-15 sex acts in total in short duration sexual partnerships and at commercial sex.                                                                                                                                        |
| 31 | RateOfSexActs_highhigh | $w_{3,3}$                                                                                             | Number of sex acts per partnership per year in partnerships between those that have “many” partnerships.                                   | 2     | Uniform  | 1     | 3     | -99   | Based on 1-3 sex acts in total in short duration sexual partnerships and at commercial sex.                                                                                                                                         |
| 32 | PrCondomUseMF_low      | $\delta_{1,2,2,2}^{sex} = \delta_{2,1,2,2}^{sex} = \delta_{3,2,2,2}^{sex} = \delta_{2,3,2,2}^{sex}$   | Fraction of sex acts condom used in sex between a man and a woman who each have “few” partnerships.                                        | 0.10  | Uniform  | 0.00  | 0.2   | -99   | Assumed to be low in long-term relationships. 33% of IDUs in Karachi in 2006 report 'ever' using condoms (HIV Second Generation Surveillance in Pakistan; National Report Round II; 2006-2007; National AIDS Control Program 2007). |
| 33 | PrCondomUseMF_high     | $\delta_{1,2,3,j'}^{sex} = \delta_{1,2,2,3}^{sex} = \delta_{2,1,3,j'}^{sex} = \delta_{2,1,2,3}^{sex}$ | Fraction of sex acts condom used in sex between a man and a woman and either or both have “many” partnerships.                             | 0.220 | Triangle | 0.000 | 0.530 | 0.220 | 22% of IDU used condom at last sex with sex worker in Karachi (32); 21% of                                                                                                                                                          |

|    |                    |                                                                                                                                                                                                                                                    |                                                                                                      |       |          |       |       |         |                                                                                                                                                                                                                                                                                                                                        |
|----|--------------------|----------------------------------------------------------------------------------------------------------------------------------------------------------------------------------------------------------------------------------------------------|------------------------------------------------------------------------------------------------------|-------|----------|-------|-------|---------|----------------------------------------------------------------------------------------------------------------------------------------------------------------------------------------------------------------------------------------------------------------------------------------------------------------------------------------|
|    |                    |                                                                                                                                                                                                                                                    |                                                                                                      |       |          |       |       |         | IDUs used condoms in commercial sex transactions in multi-city surveillance in 2007; 44% of FSWs in Karachi consistently used condoms in 2006. Max based on range of 'ever condom use with sex worker' in any Pakistan city.                                                                                                           |
| 34 | PrCondomUseMM_low  | $\delta_{3,3,2,2}^{sex} = \delta_{3,4,2,2}^{sex} = \delta_{4,3,2,2}^{sex} = \delta_{4,4,2,2}^{sex}$                                                                                                                                                | Fraction of sex acts condom used in sex between two men and both have "few" partnerships.            | 0.030 | Triangle | 0.000 | 0.080 | 0.030   | 3% of MSM IDU in Karachi report condom use in sex with men. Range is min and max and men IDU reporting condom use in male-male sex in any Pakistan city. (HIV Second Generation Surveillance in Pakistan; National Report Round II; 2006-2007; National AIDS Control Program 2007; and HIV Second Generation Surveillance in Pakistan) |
| 35 | PrCondomUseMM_high | $\begin{aligned} \delta_{3,3,3,j'}^{sex} &= \delta_{3,4,3,j'}^{sex} = \delta_{4,3,3,j'}^{sex} \\ &= \delta_{4,4,3,j'}^{sex} = \delta_{3,3,2,3}^{sex} = \delta_{3,4,2,3}^{sex} \\ &= \delta_{4,3,2,3}^{sex} = \delta_{4,4,2,3}^{sex} \end{aligned}$ | Fraction of sex acts condom used in sex between two men and either or both have "many" partnerships. | 0.110 | Uniform  | 0.00  | 0.220 | -99.000 | In 2006 in Karachi, 22% of male sex workers report consistent condom use with clients (HIV Second Generation                                                                                                                                                                                                                           |

|    |                |                 |                                                                                      |        |            |        |        |     |                                                                                                                                                               |
|----|----------------|-----------------|--------------------------------------------------------------------------------------|--------|------------|--------|--------|-----|---------------------------------------------------------------------------------------------------------------------------------------------------------------|
|    |                |                 |                                                                                      |        |            |        |        |     | Surveillance in Pakistan; National Report Round III; 2006-2007) which is interpreted as an upper bound on the true level of condom use.                       |
| 36 | CondomEfficacy | $\alpha^{sex}$  | Efficacy of condoms (as used).                                                       | 0.78   | Uniform    | 0.60   | 0.95   | -99 | Range from lowest estimate in pooled meta-analysis to highest estimate for perfectly consistent use. (29) Estimate is mid-point of range.                     |
| 37 | Beta0_Sex      | $\beta_0^{sex}$ | Average transmission rate of HIV per sex act (in latent infection phase).            | 0.0038 | Log-Normal | -5.573 | 4.558  | -99 | Distribution chosen to coincide with point estimate and 95% confidence intervals of meta-analysis of rates of HIV transmission ([95% CI 0.0013-0.0110]) (17). |
| 38 | Beta0_IDU      | $\beta_0^{idu}$ | Average transmission rate of HIV per needle-sharing act (in latent infection phase). | 0.0085 | Uniform    | 0.0029 | 0.0141 | -99 | Based on literature review (23).                                                                                                                              |

**Table S3:** Parameters for used in model “fitting” for Karachi.

Distribution shapes (and parameterisation) are as follows: *Uniform* ("a" is lower limit; "b" is upper limit); *Triangle* ("a" is lower limit; "b" is upper limit; "c" is mode); *Normal* ("a" is mean; "b" is standard deviation) and *Log-Normal* ("a" is mean; "b" is standard deviation). Note that -99 is a dummy for “N/A”.



| Year of observation | (Effective) Sample Size | HIV prevalence estimate | Source |
|---------------------|-------------------------|-------------------------|--------|
| 2004                | 132                     | 54.6%                   | (8)    |
| 2005                | 269                     | 41.3%                   | (34)   |
| 2005                | 314                     | 50.0%                   | (8)    |
| 2006                | 554                     | 51.6%                   | (8)    |
| 2007                | 594                     | 52.5%                   | (8)    |
| 2008                | 11                      | 63.6%                   | (35)   |
| 2008                | 400                     | 37.5%                   | (36)   |

**Table S4:** Prevalence data for Odessa model.

| Year of observation | (Effective) Sample Size | HIV prevalence estimate | Source |
|---------------------|-------------------------|-------------------------|--------|
| 1996                | 242                     | 0.4%                    | (37)   |
| 2003                | 242                     | 23.0%                   | (32)   |
| 2003                | 242                     | 26.3%                   | (31)   |
| 2005                | 242                     | 26.5%                   | (38)   |
| 2006                | 399                     | 30.1%                   | (39)   |
| 2008                | 406                     | 23.1%                   | (40)   |

**Table S5:** Prevalence data for Karachi model.

## Methods for Nairobi Modelling

The modelling for the HIV transmission among IDU in Nairobi is complicated by the need to incorporate the high HIV prevalence rates among other populations, such as non-IDU sex workers and the general population, whilst a detailed model representation of the IDU population is prevented by the limited current availability of data on IDU population size and HIV prevalence among IDUs (We note, however, that from mid-2010, substantially more data will be available from a large survey). For these reasons, a different and simplified model of HIV transmission within and between risk groups was developed. This model built on the UNAIDS 'Modes of Transmission Model' (MoT) (41, 42), which has recently been applied to Kenya and Nairobi (43). This model examines the HIV epidemic in a particular population (in this case Nairobi) at one instant in time and, based on the HIV prevalence in discrete risk groups and estimated patterns of risk behaviour, projects the number of HIV infection, by risk-group, over the next year. In the MoT model, the risk groups include IDU, Men who have sex with Men, Female commercial sex workers, those having casual heterosexual partnerships and those at no risk of HIV infection. In Nairobi, it was estimated that approximately 5% of new infection currently arise among the IDU population (43).

The model was developed to incorporate more detail about the IDU population. The IDU population was divided into sub-groups of IDU Men, IDU Women, IDU Men who have sex with men and IDU Women who sell sex. IDU in the model were thus exposed to a risk of HIV infection via sexual contact in addition to the risk of HIV infection via exposure to contaminated injecting equipment. It was assumed that the risk of transmission IDU-MSM through sex with men was the same as for other MSM; that the risk of transmission to IDU-CSW through sex with client was the same as for other CSW; and that the risk of transmission to other IDU through sex was the same as for others having casual heterosexual partnerships. It was assumed that IDU-MSM mixed randomly with non-IDU MSM; that IDU-CSW mix randomly with clients; and that IDU men and women mix randomly with non-IDU women and men, respectively. A 'pattern of contact' parameter was introduced that allow the rate of HIV transmission to IDU to represent, at one extreme, IDU mixing "randomly" (where at each injection, the individual IDU uses a syringe that could have previously used by any other IDU) or, at the other extreme, IDU forming "stable injecting partnerships" (where syringes are only shared with one partner). Changes in prevalence over time were reproduced by assuming a mean survival time after HIV infection of 10.0 years, and the IDU population size was allowed to grow at a fixed rate, with the assumption that all new IDU were uninfected.

To ensure consistency of the model results with other epidemiological information, the estimated total number of new infections among the non-IDU population per year in Nairobi in the model with no further intervention was constrained to be equal with HIV incidence rate estimated in the UNAIDS (Spectrum model (44, 45)) estimates 2007.

The uncertainty in the model projections is approximated using a Monte Carlo scheme, allowing parameters relating to IDU population size, prevalence and behaviour to independently vary over a uniform distribution (with bounds specified below).



The impact of OST and NEP were incorporated by allowing, for a proportion of IDU population given by the intervention ‘coverage’, the rate of exposure to non-sterile syringes to be reduced by the assumed efficacy of that intervention (see ‘*Assumed Efficacy of OST/NEP Interventions*’ above). The impact of ART was incorporated by reducing the infectiousness of a proportion of the HIV-infected IDU population expected to be in need of treatment. This implies ART being required for individuals with a CD4 cell count of less than 350 cells per microliter of peripheral blood. With analogy to the models in Odessa and Karachi, this amounts to assuming that 40% of all HIV-infected individuals are in need of treatment (20), and that treatment reduces infectiousness by 92%, on average (24).

Table S6 lists the parameter values used for the modelling projections. Values for other model behaviour parameters were based on Kenya MoT project, where parameters were evaluated through literature reviews and with expert opinions, and around which a broad consensus was developed (43). Parameters specifying HIV transmission rates are the same as the same as used in the other models (Table S1).

| Parameter                                                                                                                                           | Value or Range                              | Source                                                                                                                                                                                                                         |
|-----------------------------------------------------------------------------------------------------------------------------------------------------|---------------------------------------------|--------------------------------------------------------------------------------------------------------------------------------------------------------------------------------------------------------------------------------|
| <b>Number of IDU</b>                                                                                                                                | 3000-5000                                   | <i>UNODC Regional Office for Eastern Africa.</i>                                                                                                                                                                               |
| <b>IDU population annual growth rate.</b>                                                                                                           | 0%-4%                                       | <i>UNODC Regional Office for Eastern Africa</i>                                                                                                                                                                                |
| <b>HIV prevalence among IDU in 2010</b>                                                                                                             | 33% - 50%                                   | Lower-bound is self-reported HIV test result in Nairobi Outreach Services Trust UNODC Report on Contacts, Average Jan-Oct 2000 (46); Upper bound is empirical observation of HIV prevalence among IDU in Mombasa in 2004 (47). |
| <b>Proportion of IDU:</b><br><i>IDU-Female</i><br><i>IDU-Female Sex Worker</i><br><i>IDU-Male</i><br><i>IDU-Msm</i><br><i>IDU-Male That Buy Sex</i> | 7.00%<br>12.00%<br>65.61%<br>7.29%<br>8.10% | <i>Nairobi Outreach Services Trust UNODC Report on Contacts 2009</i>                                                                                                                                                           |
| <b>Frequency of Injecting with non-sterile equipment per week</b>                                                                                   | 3.6 (1-6)                                   | Mean and 95% interval of reported numbers of injections per week with ‘shared’ syringes/needles, among IDU contact in Nairobi (46).                                                                                            |

|                                                                                           |       |                                                                                                                                                                                                                                                                        |
|-------------------------------------------------------------------------------------------|-------|------------------------------------------------------------------------------------------------------------------------------------------------------------------------------------------------------------------------------------------------------------------------|
| <b>Pattern of Contact Parameter</b>                                                       | 0-0.5 | Broad range represent substantial uncertainty in mixing pattern, although it is assumed that mixing is more likely to be based around sets of injecting partnerships than fully random mixing. (0 indicates stable injecting partnerships; 1 indicates random mixing.) |
| <b>Baseline Coverage of OST in 2010</b>                                                   | 0     | <i>UNODC Regional Office for Eastern Africa.</i>                                                                                                                                                                                                                       |
| <b>Baseline Coverage of NEP in 2010</b>                                                   | 0     | <i>UNODC Regional Office for Eastern Africa</i>                                                                                                                                                                                                                        |
| <b>Fraction of individuals expected to be able to access ART, when required, in 2010.</b> | 30%   | <i>UNODC Regional Office for Eastern Africa</i>                                                                                                                                                                                                                        |

**Table S6:** Parameter value for Nairobi IDU model.

Summary Statistics: Studies of HIV Risk Factors, Correlates and Determinants among IDU Populations: Summary Statistics from 2000-2009

|                                                                                                                                  | 1999-2001 |        | 2002-2004 |        | 2005-2007 |        | 2008-2009 |        | All Years |        | P-value [3] |
|----------------------------------------------------------------------------------------------------------------------------------|-----------|--------|-----------|--------|-----------|--------|-----------|--------|-----------|--------|-------------|
|                                                                                                                                  | N         |        | N         |        | N         |        | N         |        | N         |        |             |
| <b>Total</b>                                                                                                                     | 14        | 100.0% | 22        | 100.0% | 36        | 100.0% | 22        | 100.0% | 94        | 100.0% | 0.168       |
| <b>Prospective or Panel Study</b>                                                                                                | 6         | 42.9%  | 12        | 54.5%  | 14        | 38.9%  | 5         | 22.7%  | 37        | 39.4%  | 0.496       |
| <b>Conducted in low/middle income country [1]</b>                                                                                | 3         | 21.4%  | 7         | 31.8%  | 14        | 38.9%  | 11        | 50.0%  | 35        | 37.2%  | 0.018       |
| <b>Country with HIV prevalence among IDUs = 20% [2]</b>                                                                          | 4         | 28.6%  | 7         | 31.8%  | 12        | 33.3%  | 4         | 18.2%  | 27        | 28.7%  | 0.32        |
| <b>Aimed to study risk environment</b>                                                                                           | 6         | 42.9%  | 1         | 4.5%   | 12        | 30.6%  | 6         | 27.3%  | 25        | 26.5%  | 0.336       |
| <b>Identified &gt;= one risk environment factor</b>                                                                              | 12        | 85.7%  | 18        | 81.8%  | 32        | 88.9%  | 19        | 86.4%  | 81        | 86.2%  | 0.192       |
| <b>Micro-physical</b>                                                                                                            | 4         | 28.6%  | 9         | 40.9%  | 19        | 52.8%  | 10        | 45.5%  | 42        | 44.7%  | 0.068       |
| <b>Micro-social</b>                                                                                                              | 7         | 50.0%  | 12        | 54.5%  | 16        | 44.4%  | 7         | 31.8%  | 42        | 44.7%  | 0.979       |
| <b>Micro-economic</b>                                                                                                            | 4         | 28.6%  | 3         | 13.6%  | 4         | 11.1%  | 4         | 18.2%  | 15        | 16.0%  | 0.968       |
| <b>Micro-policy</b>                                                                                                              | 0         | 0.0%   | 2         | 9.1%   | 5         | 13.9%  | 4         | 18.2%  | 11        | 11.7%  | 0.034       |
| <b>Macro-physical</b>                                                                                                            | 1         | 7.1%   | 1         | 4.5%   | 2         | 5.6%   | 1         | 4.5%   | 5         | 5.3%   | 0.31        |
| <b>Macro-social</b>                                                                                                              | 2         | 14.3%  | 4         | 18.2%  | 11        | 30.6%  | 7         | 31.8%  | 24        | 25.5%  | 0.031       |
| <b>Macro-economic</b>                                                                                                            | 0         | 0.0%   | 0         | 0.0%   | 1         | 2.8%   | 0         | 0.0%   | 1         | 1.1%   | 0.631       |
| <b>Macro-policy</b>                                                                                                              | 2         | 14.3%  | 0         | 0.0%   | 0         | 0.0%   | 1         | 4.5%   | 3         | 3.2%   | 0.811       |
| <b>Identified &gt;= one risk environment factor excluding sex/race</b>                                                           | 11        | 78.6%  | 16        | 72.7%  | 29        | 80.6%  | 18        | 81.8%  | 74        | 78.7%  | 0.164       |
| <b>Identified &gt;= one endogenous host factor</b>                                                                               | 11        | 78.6%  | 16        | 72.7%  | 25        | 69.4%  | 13        | 59.1%  | 65        | 69.1%  | 0.528       |
| <b>Identified &gt;= one endogenous biologic factor</b>                                                                           | 1         | 7.1%   | 2         | 9.1%   | 4         | 11.1%  | 7         | 31.8%  | 14        | 14.9%  | 0.018       |
| <b>Identified one endogenous host, one endogenous biologic, and one risk environment factor</b>                                  | 1         | 7.1%   | 2         | 9.1%   | 2         | 5.6%   | 3         | 13.6%  | 8         | 8.5%   | 0.43        |
| <b>Identified at least one micro level factor (As proportion of papers that identified at least one risk environment factor)</b> | 9         | 75.0%  | 16        | 88.9%  | 28        | 87.5%  | 17        | 89.5%  | 70        | 86.4%  | 0.126       |
| <b>Identified at least one macro level factor</b>                                                                                | 4         | 33.3%  | 5         | 27.8%  | 13        | 40.6%  | 8         | 42.1%  | 30        | 37.0%  | 0.094       |
| <b>Macro-level Risk environment variables identified</b>                                                                         | 5         | 13.2%  | 5         | 13.2%  | 16        | 42.1%  | 12        | 31.6%  | 38        | 100.0% | 0.018       |
| <b>Physical</b>                                                                                                                  | 1         | 2.6%   | 1         | 2.6%   | 2         | 5.3%   | 1         | 2.6%   | 5         | 13.2%  | 0.314       |
| <b>Social</b>                                                                                                                    | 2         | 5.3%   | 4         | 10.5%  | 13        | 34.2%  | 10        | 26.3%  | 29        | 76.3%  | 0.015       |
| <b>Economic</b>                                                                                                                  | 0         | 0.0%   | 0         | 0.0%   | 1         | 2.6%   | 0         | 0.0%   | 1         | 2.6%   | 0.631       |
| <b>Policy</b>                                                                                                                    | 2         | 5.3%   | 0         | 0.0%   | 0         | 0.0%   | 1         | 2.6%   | 3         | 7.9%   | 0.811       |
| <b>Micro-level Risk environment variables identified</b>                                                                         | 25        | 16.9%  | 36        | 24.3%  | 52        | 35.1%  | 34        | 23.0%  | 148       | 100.0% | 0.415       |
| <b>Physical</b>                                                                                                                  | 7         | 4.7%   | 14        | 9.5%   | 22        | 14.9%  | 11        | 7.4%   | 54        | 36.5%  | 0.399       |
| <b>Social</b>                                                                                                                    | 14        | 9.5%   | 17        | 11.5%  | 19        | 12.8%  | 14        | 9.5%   | 64        | 43.2%  | 0.914       |
| <b>Economic</b>                                                                                                                  | 4         | 2.7%   | 3         | 2.0%   | 5         | 3.4%   | 5         | 3.4%   | 17        | 11.5%  | 0.66        |
| <b>Policy</b>                                                                                                                    | 0         | 0.0%   | 2         | 1.4%   | 7         | 4.7%   | 4         | 2.7%   | 13        | 8.8%   | 0.035       |

[1] Income level groups follow World Bank categories.

<<<http://web.worldbank.org/WBSITE/EXTERNAL/DATASTATISTICS/0,contentMDK:20421402~pagePK:64133150~piPK:64133175~theSitePK:239419,00.html>>>

[2] Countries with HIV prevalence among IDUs  $\geq$  20% according to Mathers et al (reference 1 in paper) include Argentina, Brazil, Burma, Cambodia, China, Estonia, Kenya, Libya, Nepal, Russia, Spain, Thailand, Ukraine, Vietnam.

[3] P-values are for the coefficient in a regression of the number of papers in each category on year.

## References

1. Garnett GP, Gregson S. Monitoring the course of the HIV-1 epidemic: the influence of patterns of fertility on HIV-1 prevalence estimates. *Mathematical Population Studies*. 2000;8(3):251-77.
2. Poole D, Raftery AE. Inference for deterministic simulation models: The Bayesian melding approach. *Journal of the American Statistical Association*. 2000 Dec;95(452):1244-55.
3. Alkema L, Raftery AE, Clark SJ. Probabilistic projections of HIV prevalence using Bayesian melding. *The Annals of Applied Statistics*; 2007. p. 229-48.
4. Rubin D. Using the SIR algorithm to simulate posterior distributions. Oxford, UK: Clarendon Press; 1988.
5. Blower SM, Dowlatabadi H. Sensitivity and uncertainty analysis of complex models of disease transmission: an HIV model, as an example. *International Statistical Review*. 1994;62(2):229-43.
6. Kirkwood B, Sterne JAC. *Essential Medical Statistics (Second Edition)*: Blackwell Science; 2003.
7. Mathers BM, Degenhardt L, Phillips B, Wiessing L, Hickman M, Strathdee SA, et al. Global epidemiology of injecting drug use and HIV among people who inject drugs: a systematic review. *Lancet*. 2008 Nov 15;372(9651):1733-45.
8. Booth RE, Lehman WE, Dvoryak S, Brewster JT, Sinitsyna L. Interventions with injection drug users in Ukraine. *Addiction*. 2009 Nov;104(11):1864-73.
9. Emmanuel F, Archibald C, Razaque A, Sandstrom P. Factors associated with an explosive HIV epidemic among injecting drug users in Sargodha, Pakistan. *J Acquir Immune Defic Syndr*. 2009 May 1;51(1):85-90.
10. Wodak A, Cooney A. Do needle syringe programs reduce HIV infection among injecting drug users: a comprehensive review of the international evidence. *Subst Use Misuse*. 2006;41(6-7):777-813.
11. Metzger DS, Navaline H. Human immunodeficiency virus prevention and the potential of drug abuse treatment. *Clin Infect Dis*. 2003 Dec 15;37 Suppl 5:S451-6.
12. Caplehorn JR, Ross MW. Methadone maintenance and the likelihood of risky needle-sharing. *Int J Addict*. 1995 May;30(6):685-98.
13. Gossop M, Marsden J, Stewart D, Treacy S. Reduced injection risk and sexual risk behaviours after drug misuse treatment: results from the National Treatment Outcome Research Study. *AIDS Care*. 2002 Feb;14(1):77-93.
14. Avins AL, Lindan CP, Woods WJ, Hudes ES, Boscarino JA, Kay J, et al. Changes in HIV-related behaviors among heterosexual alcoholics following addiction treatment. *Drug Alcohol Depend*. 1997 Jan 10;44(1):47-55.
15. Metzger DS, Woody GE, McLellan AT, O'Brien CP, Druley P, Navaline H, et al. Human immunodeficiency virus seroconversion among intravenous drug users in- and out-of-treatment: an 18-month prospective follow-up. *J Acquir Immune Defic Syndr*. 1993 Sep;6(9):1049-56.
16. Thiede H, Hagan H, Murrill CS. Methadone treatment and HIV and hepatitis B and C risk reduction among injectors in the Seattle area. *J Urban Health*. 2000 Sep;77(3):331-45.
17. Boily MC, Baggaley RF, Wang L, Masse B, White RG, Hayes RJ, et al. Heterosexual risk of HIV-1 infection per sexual act: systematic review and meta-analysis of observational studies. *Lancet Infect Dis*. 2009 Feb;9(2):118-29.

18. Wilson DP, Law MG, Grulich AE, Cooper DA, Kaldor JM. Relation between HIV viral load and infectiousness: a model-based analysis. *Lancet*. 2008 Jul 26;372(9635):314-20.
19. Hollingsworth TD, Anderson RM, Fraser C. HIV-1 transmission, by stage of infection. *J Infect Dis*. 2008 Sep 1;198(5):687-93.
20. The eligibility for ART in lower income countries collaboration. Duration from seroconversion to eligibility for antiretroviral therapy and from ART eligibility to death in adult HIV-infected patients from low and middle-income countries: collaborative analysis of prospective studies. *Sex Transm Infect*. 2008 August 1, 2008;84(Suppl\_1):i31-6.
21. Collaborative Group on AIDS Incubation and HIV Survival. Time from HIV-1 seroconversion to AIDS and death before widespread use of highly-active antiretroviral therapy: a collaborative re-analysis. Collaborative Group on AIDS Incubation and HIV Survival including the CASCADE EU Concerted Action. Concerted Action on SeroConversion to AIDS and Death in Europe. *Lancet*. 2000 Apr 1;355(9210):1131-7.
22. Stover J, Bertozzi S, Gutierrez JP, Walker N, Stanek KA, Greener R, et al. The global impact of scaling up HIV/AIDS prevention programs in low- and middle-income countries. *Science*. 2006 Mar 10;311(5766):1474-6.
23. Vickerman P, Peeling RW, Terris-Prestholt F, Changalucha J, Mabey D, Watson-Jones D, et al. Modelling the cost-effectiveness of introducing rapid syphilis tests into an antenatal syphilis screening programme in Mwanza, Tanzania. *Sex Transm Infect*. 2006 Dec;82 Suppl 5:v38-v43.
24. Attia S, Egger M, Muller M, Zwahlen M, Low N. Sexual transmission of HIV according to viral load and antiretroviral therapy: systematic review and meta-analysis. *AIDS*. 2009 Jul 17;23(11):1397-404.
25. The Ukrainian Institute for Social Research named after O.Yeremenko. Behavior monitoring of injection drug users as a component of second generation surveillance. [http://www.aidsalliance.org.ua/ru/library/our/monitoring\\_reports/pdf/report\\_IDU\\_rus.pdf](http://www.aidsalliance.org.ua/ru/library/our/monitoring_reports/pdf/report_IDU_rus.pdf). Kiev: International HIV/AIDS Alliance in Ukraine; 2007.
26. Vickerman P, Kumaranayake L, Balakireva O, Guinness L, Artyukh O, Semikop T, et al. The cost-effectiveness of expanding harm reduction activities for injecting drug users in Odessa, Ukraine. *Sex Transm Dis*. 2006 Oct;33(10 Suppl):S89-102.
27. Garnett GP, Anderson RM. Contact tracing and the estimation of sexual mixing patterns: the epidemiology of gonococcal infections. *Sex Transm Dis*. 1993 Jul-Aug;20(4):181-91.
28. Garnett GP, Anderson RM. Balancing sexual partnerships in an age and activity stratified model of HIV transmission in heterosexual populations. *IMA J Math Appl Med Biol*. 1994;11(3):161-92.
29. Pinkerton SD, Abramson PR. Effectiveness of condoms in preventing HIV transmission. *Soc Sci Med*. 1997 May;44(9):1303-12.
30. Wang C, Vlahov D, Galai N, Bareta J, Strathdee SA, Nelson KE, et al. Mortality in HIV-seropositive versus -seronegative persons in the era of highly active antiretroviral therapy: implications for when to initiate therapy. *J Infect Dis*. 2004 Sep 15;190(6):1046-54.
31. Altaf A, Shah SA, Zaidi NA, Memon A, Nadeem ur R, Wray N. High risk behaviors of injection drug users registered with harm reduction programme in Karachi, Pakistan. *Harm Reduct J*. 2007;4:7.
32. Bokhari A, Nizamani NM, Jackson DJ, Rehan NE, Rahman M, Muzaffar R, et al. HIV risk in Karachi and Lahore, Pakistan: an emerging epidemic in injecting and commercial sex networks. *Int J STD AIDS*. 2007 Jul;18(7):486-92.

33. Kuo I, ul-Hasan S, Galai N, Thomas D, Zafar T, Ahmed M. High HCV seroprevalence and HIV drug use risk behaviors among injection drug users in Pakistan. *Harm Reduct J.* 2006;3(26).
34. Ministry of Health of Ukraine. National report on monitoring progress towards UNGASS declaration of commitment on HIV/AIDS. ([http://data.unaids.org/pub/Report/2008/ukraine\\_2008\\_country\\_progress\\_report\\_en.pdf](http://data.unaids.org/pub/Report/2008/ukraine_2008_country_progress_report_en.pdf)). Kyiv; 2008.
35. International HIV/AIDS Alliance in Ukraine, Kiev International Institute of Sociology. Monitoring behavior of female commercial sex workers as a component of second generation epidemiological survey in 16 Ukrainian cities. [http://www.aidsalliance.org.ua/ru/library/our/monitoring\\_reports/pdf/FSW\\_report\\_2008.pdf](http://www.aidsalliance.org.ua/ru/library/our/monitoring_reports/pdf/FSW_report_2008.pdf) ICF „International HIV/AIDS Alliance in Ukraine”, 2008. Kyiv; 2008.
36. Pohorila N, Dieva T, Maksomov M, SOCIS-CSPS, International HIV/AIDS Alliance in Ukraine. Analytical report based on 2008 survey results: Monitoring the Behaviour of Injecting Drug Users. ([http://www.aidsalliance.org.ua/ru/library/our/monitoring\\_reports/pdf/IDU\\_report\\_2008\\_en\\_gl.pdf](http://www.aidsalliance.org.ua/ru/library/our/monitoring_reports/pdf/IDU_report_2008_en_gl.pdf)) Kiev; 2008.
37. Agha A, Parviz S, Younus M, Fatmi Z. Socio-economic and demographic factors associated with injecting drug use among drug users in Karachi, Pakistan. *J Pak Med Assoc.* 2006 Jan;56(1 Suppl 1):S55-60.
38. Emmanuel F, Fatima M. Coverage to curb the emerging HIV epidemic among injecting drug users in Pakistan: delivering prevention services where most needed. *Int J Drug Policy.* 2008 Apr;19 Suppl 1:S59-64.
39. National AIDS Control Program. HIV Second Generation Surveillance in Pakistan - National Report Round II: 2006-2007; 2007.
40. National AIDS Control Program. HIV Second Generation Surveillance in Pakistan - National Report Round III: 2008; 2008.
41. Pisani E, Garnett GP, Grassly NC, Brown T, Stover J, Hankins C, et al. Back to basics in HIV prevention: focus on exposure. *BMJ.* 2003 Jun 21;326(7403):1384-7.
42. Gouws E, White PJ, Stover J, Brown T. Short term estimates of adult HIV incidence by mode of transmission: Kenya and Thailand as examples. *Sex Transm Infect.* 2006 Jun;82 Suppl 3:iii51-5.
43. National AIDS Control Council, Gelmon L, Kenya P, Oguya F, Cheluget B, Haile G. Kenya: HIV Prevention Response and Modes of Transmission Analysis: UNAIDS & The Global HIV/AIDS Program - The World Bank,; 2009.
44. Futures Institute. Spectrum - AIDS Impact Model (<http://www.futuresinstitute.org/pages/spectrum.aspx>).
45. Stover J, Walker N, Grassly NC, Marston M. Projecting the demographic impact of AIDS and the number of people in need of treatment: updates to the Spectrum projection package. *Sex Transm Infect.* 2006 Jun;82 Suppl 3:iii45-50.
46. United Nations Office on Drugs and Crime. Nairobi Outreach Services Trust UNODC Report on Contacts 2009.
47. United Nations Office on Drugs and Crime. A study on the linkages between drug abuse, injecting drug use and HIV/AIDS in Kenta: A Rapid Situation Assessment.: United Nations Office on Drugs and Crime,; 2004.

48. Altaf A, Saleem N, Abbas S, Muzaffar R. High prevalence of HIV infection among injection drug users (IDUs) in Hyderabad and Sukkur, Pakistan. *J Pak Med Assoc* 2009 March; **59**(3): 136-40.
49. Anderson RM, May RM. Infectious diseases of humans. Oxford University Press; 1991.
50. Balakireva, O., Semerik, O., Guk, A., Bochkova, L., Reshevska, I., Jaremenko, O., Nemtsov, A., Kostuk, O., Semkop, T., Poliantsev, P., and Rulevskaja, O. Situational analysis with HIV/AIDS epidemic in Odesa region, and analysis of counter-reaction. USAID, Kiev, Vydavnytstvo Raevskogo; 2006.
51. Balakireva O. Behavior monitoring of injection drug users as a component of second generation surveillance. *Kiev: International HIV/AIDS Alliance in Ukraine* 2007; Available from: URL: [http://www.aidsalliance.org.ua/ru/library/our/monitoring\\_reports/pdf/report\\_IDU\\_rus.pdf](http://www.aidsalliance.org.ua/ru/library/our/monitoring_reports/pdf/report_IDU_rus.pdf). Last accessed: 9-5-2009.
52. Bluthenthal RN, Lorvick J, Kral AH, Erringer EA, Kahn JG. Collateral damage in the war on drugs: HIV risk behaviors among injection drug users. *Int J Drug Policy* 1999; **10**: 25-38.
53. Burris S, Blankenship KM, Donoghoe M, et al. Addressing the "risk environment" for injection drug users: the mysterious case of the missing cop. *Milbank Q* 2004; **82**(1): 125-56.
54. Collaborative Group on AIDS Incubation and HIV Survival. Time from HIV-1 seroconversion to AIDS and death before widespread use of highly-active antiretroviral therapy: A collaborative re-analysis. Collaborative Group on AIDS Incubation and HIV Survival including the CASCADE EU Concerted Action. Concerted Action on SeroConversion to AIDS and Death in Europe. *Lancet* 2000 April 1; **355**(9210): 1131-7.
55. DeBell D, Carter R. Impact of transition on public health in Ukraine: case study of the HIV/AIDS epidemic. *BMJ* 2005 July 23; **331**(7510): 216-9.
56. Des Jarlais DC, Friedman SR. HIV infection among intravenous drug users: Epidemiology and risk reduction. *AIDS* 1987 July; **1**(2): 67-76.
57. Friedman SR, Rossi D, Braine N. Theorizing "Big Events" as a potential risk environment for drug use, drug-related harm and HIV epidemic outbreaks. *Int J Drug Policy* 2009 May; **20**(3): 283-91.
58. Galea S, Vlahov D. Social determinants and the health of drug users: Socioeconomic status, homelessness, and incarceration. *Public Health Rep* 2002; **117 Suppl 1**: S135-S145.
59. Hacker MA, Leite I, Friedman SR, Carrijo RG, Bastos FI. Poverty, bridging between injecting drug users and the general population, and "interiorization" may explain the spread of HIV in southern Brazil. *Health Place* 2009 June; **15**(2): 514-9.
60. Hamers FF, Batter V, Downs AM, Alix J, Cazein F, Brunet JB. The HIV epidemic associated with injecting drug use in Europe: Geographic and time trends. *AIDS* 1997 September; **11**(11): 1365-74.
61. Haque N, Zafar T, Brahmabhatt H, Imam G, ul HS, Strathdee SA. High-risk sexual behaviours among drug users in Pakistan: Implications for prevention of STDs and HIV/AIDS. *Int J STD AIDS* 2004 September; **15**(9): 601-7.

62. Hollingsworth TD, Anderson RM, Fraser C. HIV-1 transmission, by stage of infection. *J Infect Dis* 2008 September 1; **198**(5): 687-93.
63. Khan S, Rai MA, Khanani MR, Khan MN, Ali SH. HIV-1 subtype A infection in a community of intravenous drug users in Pakistan. *BMC Infect Dis* 2006; **6**: 164.
64. Kuo I, ul-Hasan S, Galai N, et al. High HCV seroprevalence and HIV drug use risk behaviors among injection drug users in Pakistan. *Harm Reduct J* 2006; **3**: 26.
65. Latkin C, Mandell W, Vlahov D, Oziemkowska M, Celentano D. People and places: behavioral settings and personal network characteristics as correlates of needle sharing. *J Acquir Immune Defic Syndr Hum Retrovirol* 1996 November 1; **13**(3): 273-80.
66. Lima VD, Johnston K, Hogg RS, et al. Expanded access to highly active antiretroviral therapy: A potentially powerful strategy to curb the growth of the HIV epidemic. *J Infect Dis* 2008 July 1; **198**(1): 59-67.
67. Mayhew S, Collumbien M, Qureshi A, et al. Protecting the unprotected: mixed-method research on drug use, sex work and rights in Pakistan's fight against HIV/AIDS. *Sex Transm Infect* 2009 April; **85 Suppl 2**: ii31-ii36.
68. McKinlay JB, Marceau LD. Upstream healthy public policy: lessons from the battle of tobacco. *Int J Health Serv* 2000; **30**(1): 49-69.
69. Miller CL, Firestone M, Ramos R, et al. Injecting drug users' experiences of policing practices in two Mexican-U.S. border cities: public health perspectives. *Int J Drug Policy* 2008 August; **19**(4): 324-31.
70. National AIDS Control Programme. HIV second generation surveillance in Pakistan: National report round- II. Islamabad, Pakistan; 2007.
71. Platt L, Vickerman P, Collumbien M, et al. Prevalence of HIV, HCV and sexually transmitted infections among injecting drug users in Rawalpindi and Abbottabad, Pakistan: evidence for an emerging injection-related HIV epidemic. *Sex Transm Infect* 2009; **85**(Suppl. 2): 17-22.
72. Pollini RA, Brouwer KC, Lozada RM, et al. Syringe possession arrests are associated with receptive syringe sharing in two Mexico-US border cities. *Addiction* 2008 January; **103**(1): 101-8.
73. Rhodes T, Mikhailova L, Sarang A, et al. Situational factors influencing drug injecting, risk reduction and syringe exchange in Togliatti City, Russian Federation: a qualitative study of micro risk environment. *Soc Sci Med* 2003 July; **57**(1): 39-54.
74. Sarang A. Policing drug users in Russia: risk, fear, and structural violence. *Subst Use Misuse* 2010; **45**: 1-23.
75. Shah SA, Altaf A, Mujeeb SA, Memon A. An outbreak of HIV infection among injection drug users in a small town in Pakistan: Potential for national implications. *Int J STD AIDS* 2004 March; **15**(3): 209.
76. Strathdee SA, Zafar T, Brahmabhatt H, Baksh A, ul HS. Rise in needle sharing among injection drug users in Pakistan during the Afghanistan war. *Drug Alcohol Depend* 2003 July 20; **71**(1): 17-24.



77. UNAIDS/WHO. Joint united nations programme on HIV/AIDS: AIDS epidemic update. 2002.
78. Wood E, Spittal PM, Small W, et al. Displacement of Canada's largest public illicit drug market in response to a police crackdown. *CMAJ* 2004 May 11; **170**(10): 1551-6.
79. Zafar T, Brahmbhatt H, Imam G, ul HS, Strathdee SA. HIV knowledge and risk behaviors among Pakistani and Afghani drug users in Quetta, Pakistan. *J Acquir Immune Defic Syndr* 2003 April 1; **32**(4): 394-8.
